# Supplementary material for: 1D ladder and 2D bilayer coordination polymers constructed from a new T-shaped ligand: luminescence, magnetic and CO2 gas adsorption properties
Source: Royal Society of Chemistry journal article supplement (doi:10.1039/d1ce00257k), 2021-01-01
Supplement: d1ce00257k1.pdf [file d1ce00257k1.pdf]

# Electronic Supplementary Information

## 1D Ladder and 2D bilayer coordination polymers constructed from a new T-shaped ligand: Luminescent, magnetic and CO<sub>2</sub> gas adsorption properties

Meng-Ru Yin, Qing-Qing Yan, Bin Li and Guo-Ping Yong\*

Department of Chemistry, University of Science and Technology of China, Hefei 230026, P. R. China. E-mail: gpyong@ustc.edu.cn

**Table S1** Selected bond distances (Å) and angles (°) for **1–4**.<sup>a</sup>

|                     | <b>1</b>   | <b>2</b>            | <b>3</b>   | <b>4</b>            |            |                    |            |
|---------------------|------------|---------------------|------------|---------------------|------------|--------------------|------------|
| Mn(1)-N(1)#2        | 2.3119(18) | Cd(1)-Cl(1)         | 2.2560(12) | Co(1)-N(1)          | 2.252(4)   | Ni(1)-N(1)         | 2.152(2)   |
| Mn(1)-N(2)#2        | 2.2975(19) | Cd(1)-N(1)#4        | 2.3753(11) | Co(1)-N(2)#8        | 2.151(4)   | Ni(1)-N(2)#6       | 2.095(2)   |
| Mn(1)-O(1)          | 2.1337(17) | Cd(1)-N(2)#2        | 2.3892(12) | Co(1)-O(1)          | 2.006(3)   | Ni(1)-O(1)         | 2.0291(17) |
| Mn(1)-O(3)#2        | 2.1824(16) | Cd(1)-O(1)          | 2.2924(11) | Co(1)-O(3)#4        | 2.077(4)   | Ni(1)-O(5)         | 2.0551(16) |
| Mn(1)-O(5)          | 2.2098(17) | Cd(1)-O(2)          | 2.4173(11) | Co(1)-O(4)#4        | 2.296(4)   | Ni(1)-O(9)         | 2.085(2)   |
| Mn(1)-O(6)          | 2.1889(17) | Cd(1)-O(4)#4        | 2.2455(10) | Co(1)-O(5)          | 2.059(3)   | Ni(1)-O(10)        | 2.1078(19) |
| N(1)#2-Mn(1)-N(2)#2 | 93.72 (6)  | Cl(1)-Cd(1)-N(1)#4  | 107.13(4)  | N(1)-Co(1)-N(2)#8   | 168.43(16) | N(1)-Ni(1)-N(2)#6  | 168.76(8)  |
| N(1)#2-Mn(1)-O(1)   | 117.06(7)  | Cl(1)-Cd(1)-N(2)#2  | 93.10(5)   | N(1)-Co(1)-O(1)     | 79.67(14)  | N(1)-Ni(1)-O(1)    | 79.52(7)   |
| N(1)#2-Mn(1)-O(3)#2 | 73.05(6)   | Cl(1)-Cd(1)-O(1)    | 97.99(4)   | N(1)-Co(1)-O(3)#4   | 98.60(15)  | N(1)-Ni(1)-O(5)    | 102.47(7)  |
| N(1)#2-Mn(1)-O(5)   | 156.01(7)  | Cl(1)-Cd(1)-O(2)    | 153.55(4)  | N(1)-Co(1)-O(4)#4   | 84.44(14)  | N(1)-Ni(1)-O(9)    | 94.28(8)   |
| N(1)#2-Mn(1)-O(6)   | 83.60(7)   | Cl(1)-Cd(1)-O(4)#4  | 100.80(4)  | N(1)-Co(1)-O(5)     | 92.25(14)  | N(1)-Ni(1)-O(10)   | 88.50(8)   |
| N(2)#2-Mn(1)-O(1)   | 89.76(7)   | N(1)#4-Cd(1)-N(2)#2 | 149.56(4)  | N(2)#8-Co(1)-O(1)   | 89.16(16)  | N(2)#6-Ni(1)-O(1)  | 89.54(8)   |
| N(2)#2-Mn(1)-O(3)#2 | 86.28(7)   | N(1)#4-Cd(1)-O(1)   | 106.65(4)  | N(2)#8-Co(1)-O(3)#4 | 90.52(16)  | N(2)#6-Ni(1)-O(5)  | 88.66(8)   |
| N(2)#2-Mn(1)-O(5)   | 92.93(7)   | N(1)#4-Cd(1)-O(2)   | 85.23(4)   | N(2)#8-Co(1)-O(4)#4 | 94.13(15)  | N(2)#6-Ni(1)-O(9)  | 88.64(8)   |
| N(2)#2-Mn(1)-O(6)   | 176.17(7)  | N(1)#4-Cd(1)-O(4)#4 | 71.98(4)   | N(2)#8-Co(1)-O(5)   | 92.53(16)  | N(2)#6-Ni(1)-O(10) | 89.45(8)   |
| O(1)-Mn(1)-O(3)#2   | 169.42(7)  | N(2)#2-Cd(1)-O(1)   | 92.60(8)   | O(1)-Co(1)-O(3)#4   | 157.20(15) | O(1)-Ni(1)-O(5)    | 174.56(8)  |
| O(1)-Mn(1)-O(5)     | 85.98(7)   | N(2)#2-Cd(1)-O(2)   | 86.32(5)   | O(1)-Co(1)-O(4)#4   | 97.50(14)  | O(1)-Ni(1)-O(9)    | 91.98(8)   |
| O(1)-Mn(1)-O(6)     | 89.03(7)   | N(2)#2-Cd(1)-O(4)#4 | 82.21(4)   | O(1)-Co(1)-O(5)     | 99.33(14)  | O(1)-Ni(1)-O(10)   | 92.72(8)   |
| O(3)#2-Mn(1)-O(5)   | 84.43(7)   | O(1)-Cd(1)-O(2)     | 55.68(4)   | O(3)#4-Co(1)-O(4)#4 | 59.79(13)  | O(5)-Ni(1)-O(9)    | 82.85(7)   |
| O(3)#2-Mn(1)-O(6)   | 95.52(6)   | O(1)-Cd(1)-O(4)#4   | 160.68(4)  | O(3)#4-Co(1)-O(5)   | 103.46(14) | O(5)-Ni(1)-O(10)   | 92.40(7)   |
| O(5)-Mn(1)-O(6)     | 90.61(7)   | O(2)-Cd(1)-O(4)#4   | 105.30(4)  | O(4)#4-Co(1)-O(5)   | 161.98(13) | O(9)-Ni(1)-O(10)   | 174.91(7)  |

<sup>a</sup> Symmetry code for **1**: #2= -x, -y, -z; symmetry code for **2**: #2= -x, y, -z+1/2, #4= -x+1/2, y+1/2, -z+1/2; symmetry code for **3**: #4= x+1/2, -y+1/2, -z, #8= -x-1/2, y-1/2, z; symmetry code for **4**: #6= x-1/2, y, -z-1/2.

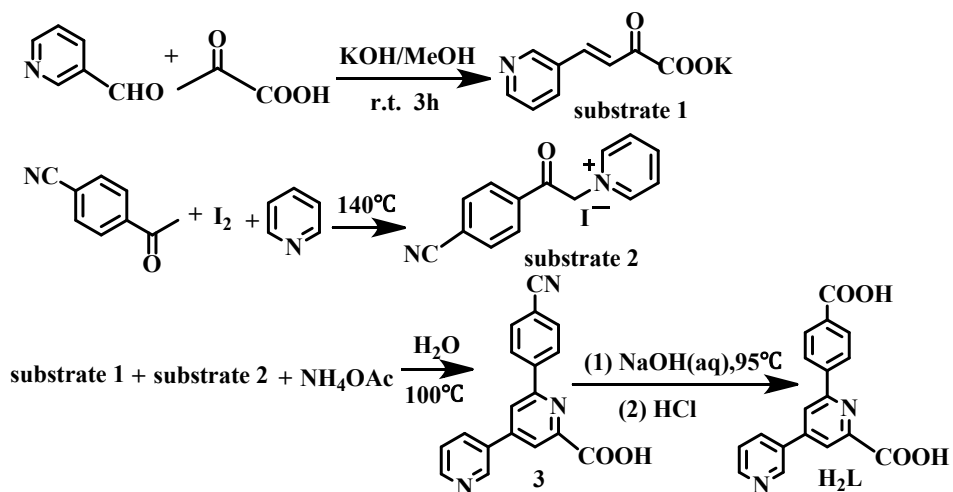

**Scheme S1** The synthesis procedure for  $\text{H}_2\text{L}$  ligand.

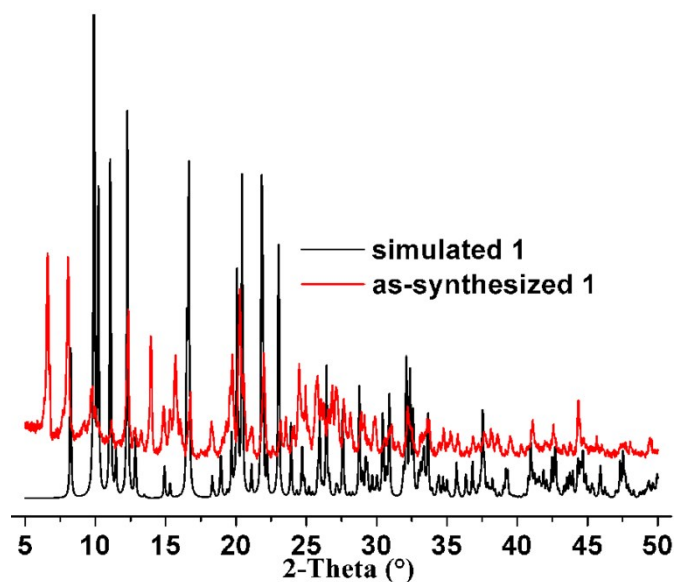

**Fig. S1** Powder XRD profiles of **1**.

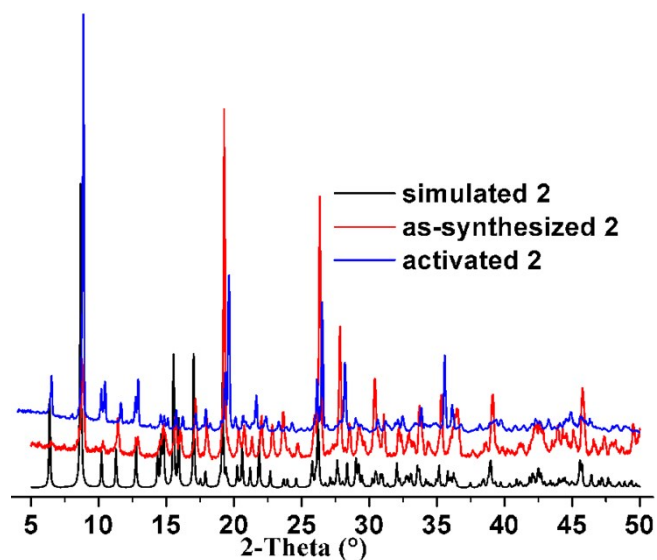

**Fig. S2** Powder XRD profiles of **2** and activated **2**.

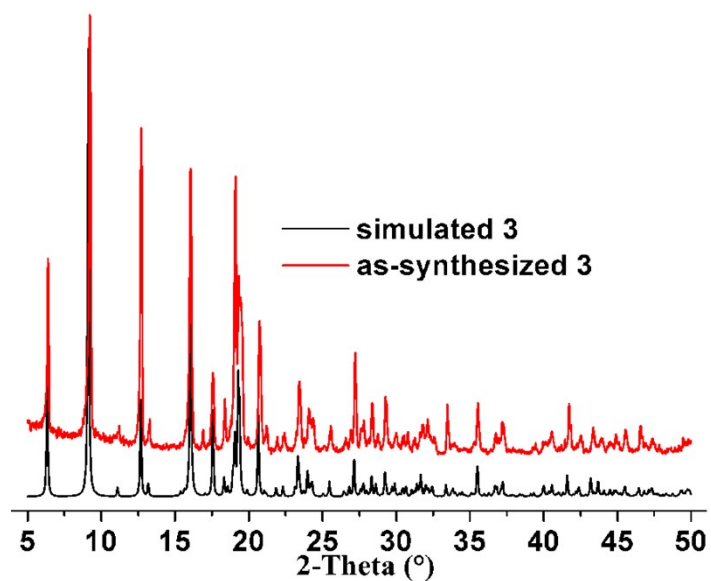

Fig. S3 Powder XRD profiles of 3.

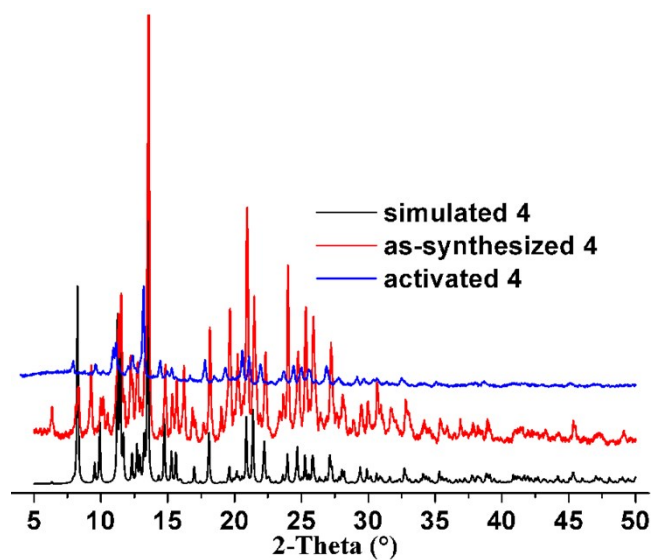

Fig. S4 Powder XRD profiles of 4 and activated 4.

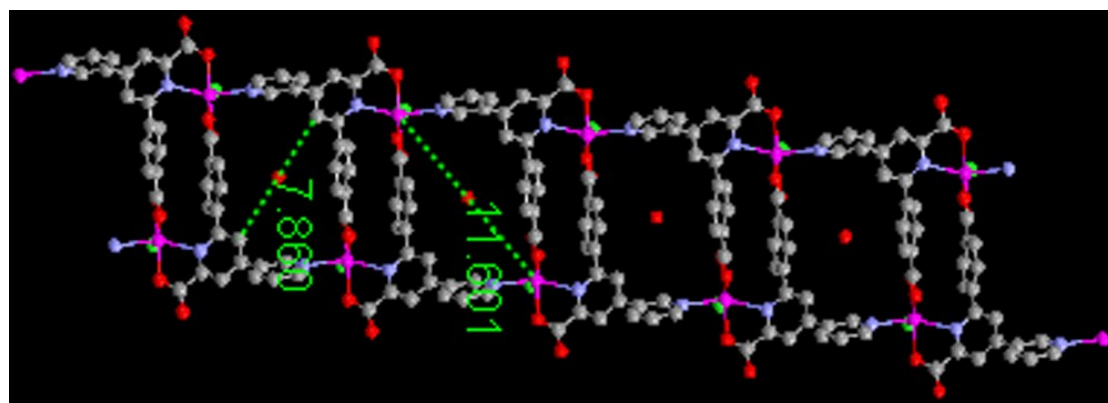

Fig. S5 The alternating rhombic grids with a view down the  $b$  axis in 2, showing the guest water molecules locate in the large grids.

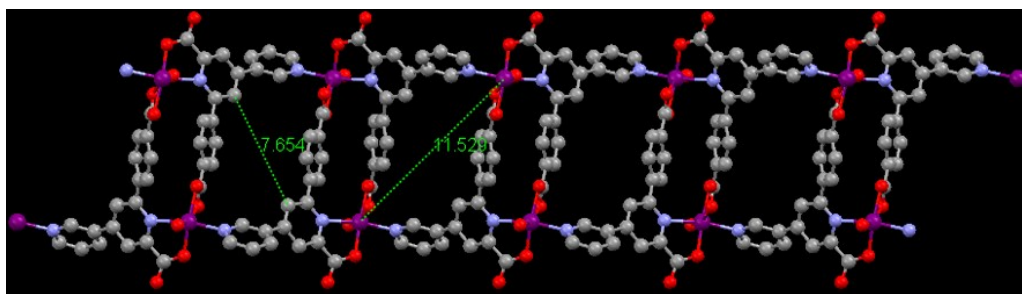

**Fig. S6** The alternating rhombic grids with a view down the *a* axis in **3**.

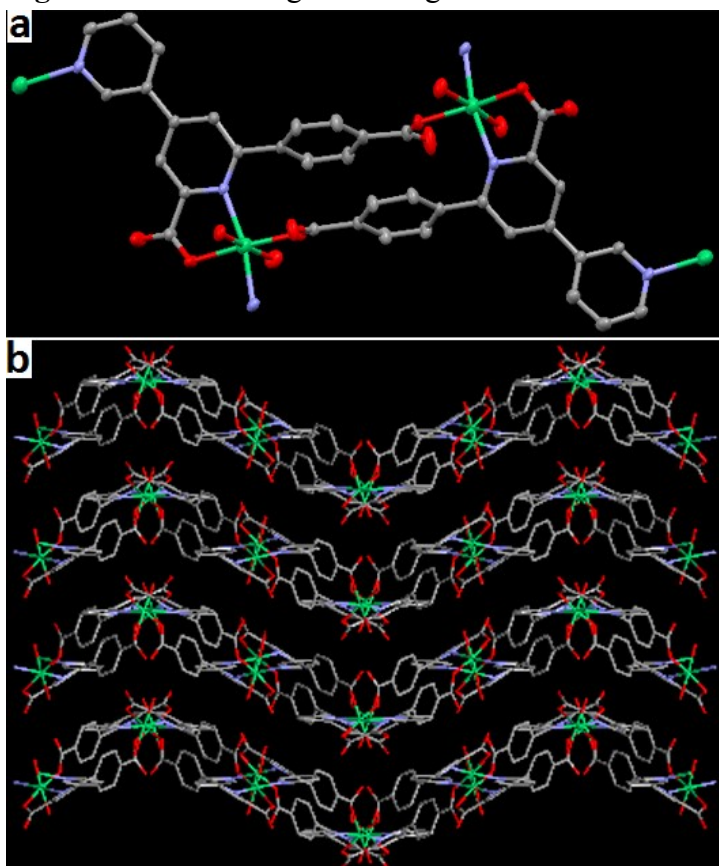

**Fig. S7** (a) The rhombic grid motif in **4**. (b) The wave-like layers and 3D supramolecular framework in **4**.

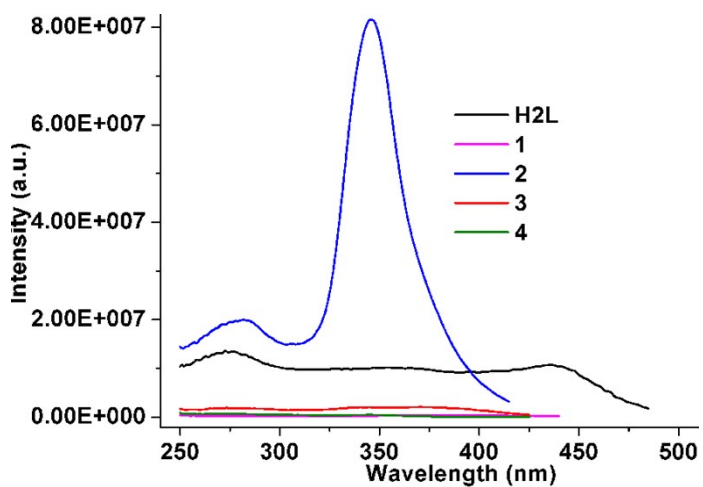

**Fig. S8** Solid-state excitation spectra of H<sub>2</sub>L ligand and coordination polymers **1–4**.
